# Supplementary material
Source: publisher figshare collection journal article supplement (https://acs.figshare.com/ndownloader/files/4080124)
Supplement: Supplementary file 1 [file 4080124]

## Supporting Information

**Table 1.** Diverse FMN binding folds in the SCOP database<sup>a</sup>

| Names of folds                                                                     | General characteristics of the fold                                                                                                     |
|------------------------------------------------------------------------------------|-----------------------------------------------------------------------------------------------------------------------------------------|
| TIM beta/alpha-barrel [51350] <sup>b</sup>                                         | Parallel $\beta$ -sheet barrel, closed; n=8, S=8; strand order<br>12345678                                                              |
| Nqo1 FMN-binding domain-like<br>[142018] <sup>b</sup>                              | 3 layers, $\alpha/\beta/\alpha$ ; parallel $\beta$ -sheet of 4 strands, order<br>3214                                                   |
| Cryptochrome/photolyase,<br>N-terminal domain [52424] <sup>b</sup>                 | 3 layers, $\alpha/\beta/\alpha$ ; parallel $\beta$ -sheet of 5 strands, order<br>32145; Rossmann-like                                   |
| Reductase/isomerase/elongation factor<br>common domain [50412] <sup>b</sup>        | Barrel, closed; n=6, S=10; greek-key motif                                                                                              |
| Split barrel-like [50474] <sup>b</sup>                                             | Barrel; n=6, S=10; greek-key motif                                                                                                      |
| NAD(P)-binding Rossmann-fold domains<br>[51734] <sup>b</sup>                       | 3 layers, $\alpha/\beta/\alpha$ ; parallel $\beta$ -sheet of 6 strands,<br>order 321456                                                 |
| Flavodoxin-like [52171] <sup>b</sup>                                               | 3 layers, $\alpha/\beta/\alpha$ ; parallel $\beta$ -sheet of 5 strands, order<br>21345                                                  |
| Homo-oligomeric flavin-containing Cys<br>decarboxylases, HFCD [52506] <sup>b</sup> | 3 layers, $\alpha/\beta/\alpha$ ; parallel $\beta$ -sheet of 6 strands, order<br>321456                                                 |
| Pyruvate kinase C-terminal domain-like<br>[52934] <sup>b</sup>                     | 3 layers, $\alpha/\beta/\alpha$ ; mixed $\beta$ -sheet of 5 strands, order<br>32145, strand 5 is antiparallel to the rest               |
| Dodecin subunit-like [88797] <sup>b</sup>                                          | 2 layers, $\alpha/\beta$ ; $\beta$ - $\alpha$ - $\beta$ (2); antiparallel $\beta$ -sheet, strand<br>order 132                           |
| Ferredoxin-like [54861] <sup>b</sup>                                               | $\alpha$ + $\beta$ sandwich with antiparallel $\beta$ -sheet; ( $\beta$ - $\alpha$ - $\beta$ )x2                                        |
| FMN-dependent nitroreductase-like<br>[55468] <sup>b</sup>                          | 3 layers, $\alpha/\beta/\alpha$ ; core ( $\alpha$ - $\beta$ - $\alpha$ - $\beta$ )x2; antiparallel $\beta$ -sheet,<br>strand order 1243 |

|                                                 |                                                                                                                              |
|-------------------------------------------------|------------------------------------------------------------------------------------------------------------------------------|
| Profilin-like [55769] <sup>b</sup>              | 3 layers, $\alpha/\beta/\alpha$ ; core 2 $\alpha$ -helices; antiparallel $\beta$ -sheet of 5 strands, order 21543;           |
| Chorismate synthase, AroC [103262] <sup>b</sup> | 3 layers, $\beta/\alpha/\beta$ ; duplication, consists of two DCoH-like $\beta(2)-\alpha-\beta(2)-\alpha$ structural repeats |

<sup>a</sup>This SCOP (Structural Classification of Protein) database is a comprehensive ordering of all proteins with known structures according to their evolutionary, functional and structural relationships. This released version is 1.75.

<sup>b</sup>The numbers in parentheses refer to SCOP ID codes.
